# Supplementary material
Source: publisher figshare collection journal article supplement (https://diabetesjournals.figshare.com/ndownloader/files/36091835)
Supplement: Supplementary file 1 [file 36091835]

Supplemental Table S1: Food Frequency Questionnaire items categorized as ultraprocessed foods using strict and broad criteria

| Food group                                     | Food/beverage item                                                                         | Strict UPF | Broad UPF |
|------------------------------------------------|--------------------------------------------------------------------------------------------|------------|-----------|
| Beverages                                      | Soft drinks, soda, or pop                                                                  | x          | x         |
|                                                | Meal replacement, energy, or high-protein beverages                                        | x          | x         |
|                                                | Fruit drinks (such as cranberry cocktail, hi-c, lemonade, or Kool-Aid, diet or regular)    | x          | x         |
|                                                | Iced tea                                                                                   |            | x         |
|                                                | tomato/vegetable juice                                                                     |            | x         |
|                                                | orange/grapefruit juice                                                                    |            | x         |
| Cereals, breads, breakfast foods, and desserts | Biscuits                                                                                   | x          | x         |
|                                                | Sweet muffins or dessert breads (including low-fat or fat-free)                            | x          | x         |
|                                                | Donuts, sweet rolls, danish or pop tarts                                                   | x          | x         |
|                                                | Cold (breakfast) cereals                                                                   | x          | x         |
|                                                | Cookies or brownies including low-fat or fat-free                                          | x          | x         |
|                                                | Pie                                                                                        | x          | x         |
|                                                | Bagels, English muffins                                                                    | x          | x         |
|                                                | Applesauce                                                                                 | x          | x         |
|                                                | Energy, high-protein, or breakfast bars                                                    | x          | x         |
|                                                | Fruit crisp, cobbler, or strudel                                                           |            | x         |
|                                                | Breads/rolls as part of sandwiches                                                         |            | x         |
|                                                | Breads/rolls not as part of sandwiches                                                     |            | x         |
|                                                | Corn bread or corn muffins                                                                 |            | x         |
|                                                | Pancakes, waffles, or French toast                                                         |            | x         |
| Vegetables and mixed foods                     | French fries, home fries, hash browned potatoes, tater tots                                | x          | x         |
|                                                | Pizza                                                                                      | x          | x         |
|                                                | Potato salad                                                                               |            | x         |
|                                                | Lasagna, stuffed shells, stuffed manicotti, ravioli, tortellini                            |            | x         |
|                                                | Macaroni and cheese                                                                        |            | x         |
|                                                | Mexican foods (tacos, tostados, tamales, fajitas, enchiladas, quesdillas, and chimchangas) |            | x         |
|                                                | Cream soup, including chowders                                                             |            | x         |

|                             |                                                                                                                  |   |   |
|-----------------------------|------------------------------------------------------------------------------------------------------------------|---|---|
| Meat, poultry, and fish     | Beef hamburgers or cheeseburgers                                                                                 | x | x |
|                             | turkey or chicken cold cuts (such as loaf, luncheon meat, turkey ham, turkey salami, or turkey pastrami)         | x | x |
|                             | luncheon or deli-style ham                                                                                       | x | x |
|                             | other cold cuts or luncheon meats (such as bologna, salami, corned beef, pastrami, or others, including low-fat) | x | x |
|                             | sausage (including low-fat)                                                                                      | x | x |
|                             | hot dogs or frankfurters (not sausages or vegetarian hot dogs)                                                   | x | x |
|                             | fried chicken (including deep fried) or chicken nuggets                                                          |   | x |
|                             | Fish sticks or fried fish                                                                                        |   | x |
|                             | Beef stew, beef pot pie, beef and noodles, beef and vegetables                                                   |   | x |
| Sauces, dressings, and fats | Roast beef or pot roast (including in mixtures)                                                                  |   | x |
|                             | mayonnaise                                                                                                       | x | x |
|                             | ketchup                                                                                                          | x | x |
|                             | margarine                                                                                                        | x | x |
|                             | pancake syrup                                                                                                    | x | x |
|                             | nondairy creamer                                                                                                 | x | x |
|                             | gravy                                                                                                            |   | x |
| Dairy products              | salad dressing                                                                                                   |   | x |
|                             | ice cream, ice cream bars or sherbet                                                                             | x | x |
|                             | frozen yogurt, sorbet, or ices                                                                                   | x | x |
|                             | sour cream                                                                                                       | x | x |
|                             | cream cheese                                                                                                     | x | x |
| Salty snacks                | crackers                                                                                                         | x | x |
|                             | potato chips, tortilla chips, or corn chips (including low-fat, fat-free, or low-salt)                           | x | x |
|                             | pretzels                                                                                                         | x | x |
|                             | popcorn                                                                                                          |   | x |
| Confectionary               | chocolate candy                                                                                                  | x | x |
|                             | other candy                                                                                                      | x | x |

Abbreviations: UPF, ultraprocessed foods

Supplemental Table S2. Description of cohort by quartiles of ultraprocessed food intake using the broad criterion, NICHD Fetal Growth Studies-Singletons 2009-2013

| Variables                        | Periconception and First Trimester Ultraprocessed Food Intake |                |                 |                 |
|----------------------------------|---------------------------------------------------------------|----------------|-----------------|-----------------|
|                                  | Quartile 1                                                    | Variables      | Quartile 1      | Variables       |
| Range (grams/day)                | 223.6 - 2323.1                                                | 2324.0- 3064.0 | 3067.0 - 3788.7 | 3789.9 - 7919.9 |
| N                                | 400                                                           | 400            | 401             | 400             |
| Age, years                       | 29.13 (5.23)                                                  | 28.48 (5.51)   | 27.98 (5.64)    | 26.83 (5.73)    |
| Race                             |                                                               |                |                 |                 |
| Non-Hispanic white               | 48 (12.00)                                                    | 101 (25.25)    | 100 (24.94)     | 84 (21.00)      |
| Non-Hispanic black               | 51 (12.75)                                                    | 98 (24.50)     | 134 (33.42)     | 193 (48.25)     |
| Hispanic                         | 156 (39.00)                                                   | 128 (32.00)    | 113 (28.18)     | 89 (22.25)      |
| Asian/Pacific Islander           | 145 (36.25)                                                   | 73 (18.25)     | 54 (13.47)      | 34 (8.50)       |
| Married or living with partner   | 324 (81.20)                                                   | 307 (76.75)    | 293 (73.07)     | 251 (62.75)     |
| Education                        |                                                               |                |                 |                 |
| <High school                     | 59 (14.75)                                                    | 47 (11.75)     | 37 (9.23)       | 39 (9.75)       |
| High school or equivalent        | 69 (17.25)                                                    | 70 (17.50)     | 76 (18.95)      | 97 (24.25)      |
| Some college/associate           | 110 (27.50)                                                   | 120 (30.00)    | 123 (30.67)     | 146 (36.50)     |
| College undergraduate            | 95 (23.75)                                                    | 90 (22.50)     | 94 (23.44)      | 69 (17.25)      |
| Postgraduate                     | 67 (16.75)                                                    | 73 (18.25)     | 71 (17.71)      | 49 (12.25)      |
| Income, thousands (US dollars)   |                                                               |                |                 |                 |
| < 30                             | 102 (33.12)                                                   | 102 (30.18)    | 94 (27.65)      | 146 (40.44)     |
| 30-39                            | 33 (10.71)                                                    | 32 (9.47)      | 28 (8.24)       | 27 (7.48)       |
| 40-49                            | 25 (8.12)                                                     | 26 (7.69)      | 28 (8.24)       | 33 (9.14)       |
| 50-75                            | 37 (12.01)                                                    | 38 (11.24)     | 48 (14.12)      | 48 (13.30)      |
| 75-99                            | 32 (10.39)                                                    | 46 (13.61)     | 48 (14.12)      | 48 (13.30)      |
| ≥ 100                            | 79 (25.65)                                                    | 94 (27.81)     | 94 (27.65)      | 59 (16.34)      |
| Full-time school or work         | 244 (61.00)                                                   | 270 (67.50)    | 295 (73.57)     | 295 (73.75)     |
| Insurance (private/managed care) | 250 (64.27)                                                   | 225 (58.44)    | 245 (62.66)     | 205 (52.97)     |
| Parity                           |                                                               |                |                 |                 |
| 0                                | 180 (45.00)                                                   | 190 (47.50)    | 190 (47.38)     | 177 (44.25)     |
| 1+                               | 220 (55.00)                                                   | 210 (52.50)    | 211 (52.62)     | 223 (55.75)     |
| Sleep duration (hours/day)       |                                                               |                |                 |                 |

|                                                        |        |                |                 |                 |                 |
|--------------------------------------------------------|--------|----------------|-----------------|-----------------|-----------------|
|                                                        | 5 to 6 | 63 (15.75)     | 57 (14.32)      | 50 (12.47)      | 75 (18.80)      |
|                                                        | 7      | 59 (14.75)     | 57 (14.32)      | 58 (14.46)      | 51 (12.78)      |
|                                                        | 8 to 9 | 171 (42.75)    | 190 (47.74)     | 183 (45.64)     | 160 (40.10)     |
|                                                        | ≥ 10   | 107 (26.75)    | 94 (23.62)      | 110 (27.43)     | 113 (28.32)     |
| Pre-pregnancy BMI, kg/m <sup>2</sup>                   |        | 24.42 (4.58)   | 25.07 (4.71)    | 25.66 (5.41)    | 26.12 (5.47)    |
| Moderate and vigorous physical activity*, MET min/week |        | 105.33 (93.50) | 127.89 (103.38) | 127.52 (113.07) | 136.83 (115.72) |
| <hr/>                                                  |        |                |                 |                 |                 |
| Dietary Variables                                      |        |                |                 |                 |                 |
| <hr/>                                                  |        |                |                 |                 |                 |
| Daily total energy, kcal/day                           |        | 1689.9 (747.6) | 1956.9 (828.9)  | 2183.0(952.4)   | 2832(1195.0)    |
| Carbohydrates, % energy                                |        | 54.9 (9.9)     | 53.2 (9.0)      | 52.7 (9.5)      | 53.4 (9.2)      |
| Protein, % energy                                      |        | 16.2 (3.8)     | 16.1 (3.3)      | 15.8 (3.4)      | 15.1 (3.3)      |
| Fat, % energy                                          |        | 31.4 (7.6)     | 32.4 (6.8)      | 33.5 (7.0)      | 33.3 (6.6)      |
| Saturated fat, % energy                                |        | 9.5 (2.6)      | 10.6 (2.6)      | 10.8 (2.4)      | 11.0 (2.4)      |
| MUFA, % energy                                         |        | 12.3 (3.8)     | 12.8 (3.5)      | 13.0 (3.4)      | 12.7 (2.9)      |
| PUFA, % energy                                         |        | 7.0 (2.5)      | 6.9 (1.9)       | 7.1 (2.0)       | 7.0 (1.8)       |
| HEI-2010 (max. 100 points)                             |        | 68.6 (9.4)     | 65.9 (11.0)     | 64.3 (10.1)     | 61.5 (9.4)      |
| Self-defined vegetarianism†                            |        |                |                 |                 |                 |
|                                                        | yes    | 36 (9.28)      | 29 (7.36)       | 16 (4.05)       | 13 (3.34)       |
|                                                        | no     | 352 (90.72)    | 365 (92.64)     | 379 (95.95)     | 376 (96.66)     |
| Whole grain (servings/day)                             |        | 0.7 (0.7)      | 0.9 (0.7)       | 1 (0.8)         | 1.1 (0.8)       |
| Non-whole grain (servings/day)                         |        | 4 (2.5)        | 4.5 (2.5)       | 4.8 (2.5)       | 6.3 (3.2)       |
| Dark green vegetable (servings/day)                    |        | 0.4 (0.6)      | 0.3 (0.5)       | 0.3 (0.5)       | 0.3 (0.3)       |
| Tomato (servings/day)                                  |        | 0.3 (0.4)      | 0.3 (0.4)       | 0.3 (0.3)       | 0.4 (0.3)       |
| Orange vegetable (servings/day)                        |        | 0.2 (0.2)      | 0.1 (0.2)       | 0.1 (0.2)       | 0.1 (0.2)       |
| White potato (servings/day)                            |        | 0.2 (0.2)      | 0.2 (0.2)       | 0.3 (0.4)       | 0.5 (0.4)       |
| Other starchy vegetable (servings/day)                 |        | 0.2 (0.2)      | 0.2 (0.2)       | 0.2 (0.2)       | 0.2 (0.4)       |
| Other vegetable (servings/day)                         |        | 0.8 (0.7)      | 0.7 (0.6)       | 0.8 (0.7)       | 0.8 (0.6)       |
| Citrus, melon, berry (servings/day)                    |        | 1.1 (1.6)      | 1.2 (1.4)       | 1.3 (1.8)       | 1.6 (1.8)       |
| Other fruit (servings/day)                             |        | 1.7 (1.6)      | 1.6 (1.4)       | 1.7 (1.8)       | 2.3 (2.3)       |
| Milk (servings/day)                                    |        | 0.9 (1.1)      | 1.1 (1.3)       | 1.2 (1.5)       | 1.2 (1.2)       |
| Yogurt (servings/day)                                  |        | 0.2 (0.3)      | 0.2 (0.3)       | 0.2 (0.3)       | 0.2 (0.3)       |
| Cheese (servings/day)                                  |        | 0.3 (0.4)      | 0.5 (0.5)       | 0.6 (0.5)       | 0.7 (0.6)       |

|                                         |             |             |             |             |
|-----------------------------------------|-------------|-------------|-------------|-------------|
| Meat (servings/day)                     | 1.1 (1)     | 1.4 (1.2)   | 1.6 (1.5)   | 2.3 (1.6)   |
| Organ meat (servings/day)               | 0 (0.1)     | 0 (0)       | 0 (0.1)     | 0 (0.1)     |
| Cured meat (servings/day)               | 0.2 (0.3)   | 0.4 (0.6)   | 0.5 (0.6)   | 0.8 (0.8)   |
| Poultry (servings/day)                  | 0.9 (1.3)   | 1.1 (1.1)   | 1.2 (1.4)   | 1.6 (1.5)   |
| Seafood high in omega-3s (servings/day) | 0.5 (0.7)   | 0.4 (0.5)   | 0.4 (0.4)   | 0.4 (0.4)   |
| Seafood low in omega-3s (servings/day)  | 0.8 (1.1)   | 0.8 (0.8)   | 0.7 (0.7)   | 0.9 (0.8)   |
| Eggs (servings/day)                     | 0.5 (0.5)   | 0.5 (0.5)   | 0.6 (0.6)   | 0.6 (0.5)   |
| Soy products (servings/day)             | 0.2 (0.5)   | 0.1 (0.4)   | 0.1 (0.3)   | 0.1 (0.3)   |
| Nuts and seeds (servings/day)           | 0.6 (1.1)   | 0.6 (0.9)   | 0.7 (1)     | 0.8 (1)     |
| Legumes (servings/day)                  | 0.1 (0.2)   | 0.1 (0.2)   | 0.1 (0.2)   | 0.1 (0.2)   |
| Oil (servings/day)                      | 18.5 (15.2) | 20.1 (13.6) | 22.5 (14.4) | 26.8 (14.4) |
| Solid fat (servings/day)                | 26.9 (15.6) | 35.9 (18.6) | 40.4 (20.3) | 55.8 (28.1) |
| Added sugar (servings/day)              | 9.2 (7)     | 13 (14.7)   | 17.2 (19.1) | 24.7 (21.1) |

Abbreviations: BMI: body mass index, MET: metabolic equivalent of task, MUFA: Monounsaturated fat, PUFA: Polyunsaturated fat, HEI-2010: Healthy Eating Index-2010

P-values were derived using ANOVA for continuous variables and chi-squared test for categorical variables

\* Physical activity in the past year was assessed using Pregnancy Physical Activity Questionnaire (PPAQ) at 8-13 weeks of gestation

† Self-defined vegetarians answered yes to the question “ For ALL of the past 3 months, have you followed a vegetarian diet?”

Foods and food groups based on MyPyramid Equivalents Database (MPED) serving units. Missing data: n=35 for self-defined vegetarianism, n=2 for physical activity , n=254 for income, n=1 for marriage, n= 49 for insurance, n=3 for sleep duration.

Ultraprocessed foods defined using broad criterion (see Supplemental Table S1)
